# Supplementary material for: Inflorescence Trait Diversity and Genotypic Differentiation as Influenced by the Environment in Elymus nutans Griseb. from Qinghai–Tibet Plateau
Source: MDPI journal article supplement (doi:10.3390/agronomy13041004), 2023-03-29
Supplement: s1 [file s1]

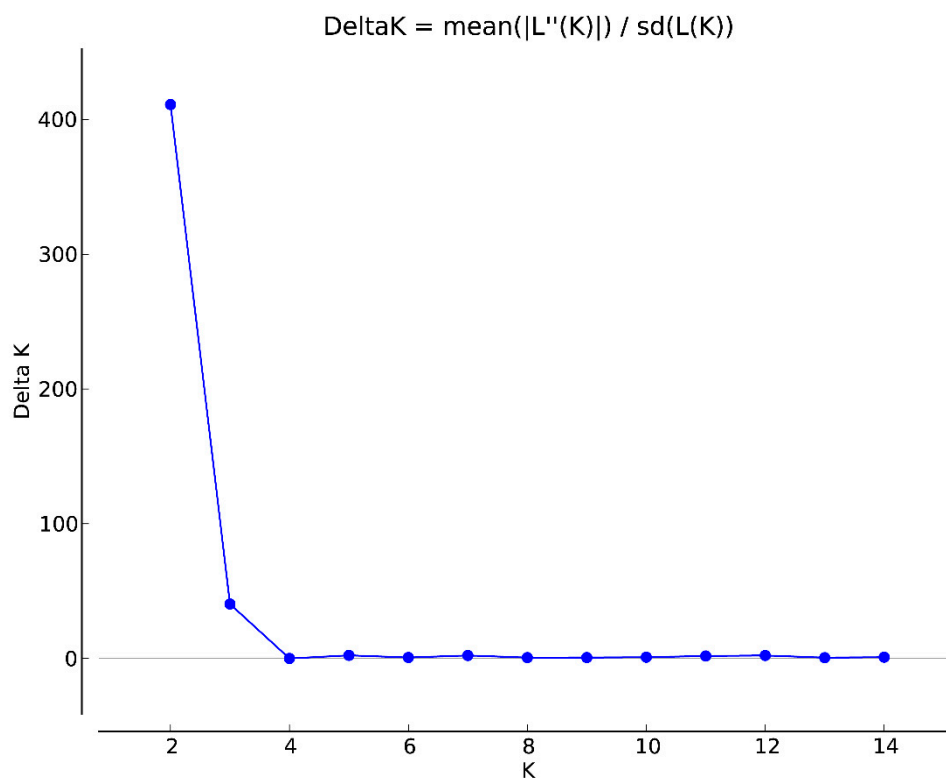

Supplementary Figure 1: The K model in the Structure Harvester website shows  $\Delta K$  corresponding to K values from 2 to 14.

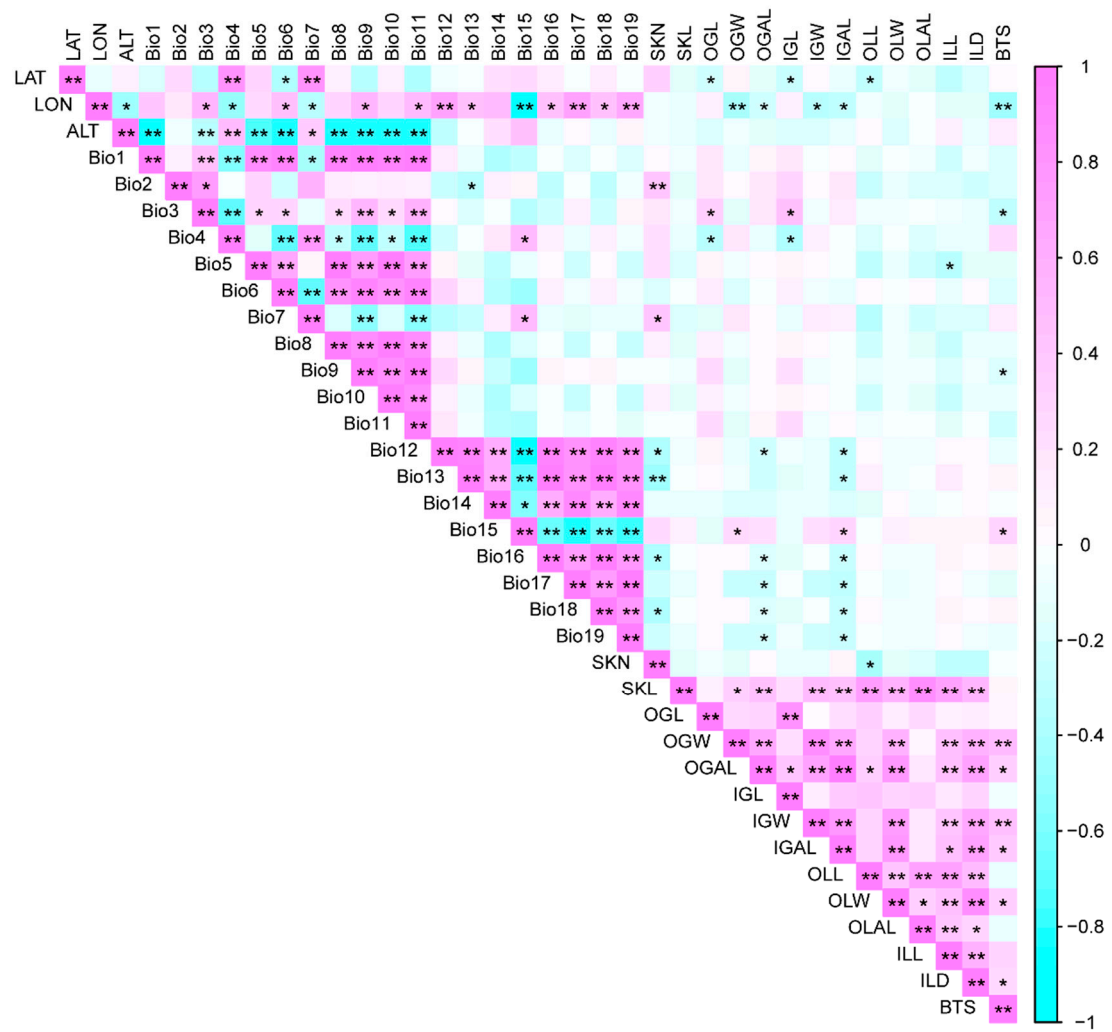

Supplementary Figure 2: Correlations between 13 panicle phenotypic traits, BTS value, and environmental conditions.
